# Supplementary material for: Prevalence and risk factors of adverse birth outcomes in the Pacific Island region: A scoping review
Source: PubMed Central journal article supplement — Lancet Reg Health West Pac. 2022 Feb 23;21:100402. doi: 10.1016/j.lanwpc.2022.100402 (PMC8873950; doi:10.1016/j.lanwpc.2022.100402), 2022-02-23
Supplement: mmc1.pdf [file mmc1.pdf]

## Supplementary Material

### Contents

|                                                                                                                                                            |    |
|------------------------------------------------------------------------------------------------------------------------------------------------------------|----|
| <b>Supplementary file 1:</b> Search strategy .....                                                                                                         | 2  |
| <b>Supplementary File 3:</b> Prevalence of adverse birth outcome .....                                                                                     | 4  |
| <b>Supplementary File 4:</b> Preferred reporting items for systematic reviews and meta-analyses extension for scoping reviews (PRISMA-ScR) checklist ..... | 5  |
| <b>Supplementary file 5.</b> Health, demographic and social risk factors associate with low birth weight..                                                 | 7  |
| <b>Supplementary file 6.</b> Health, demographic and social risk factors associate with preterm births.....                                                | 9  |
| <b>Supplementary file 7.</b> Health, demographic and social risk factors associate with small for gestational age.....                                     | 11 |
| <b>Supplementary file 8.</b> Health, demographic and social risk factors associate with changes in mean birth weight .....                                 | 13 |
| <b>Supplementary file 9:</b> Reported adverse birth outcomes and counts of risk factors nominated by health professionals interviewed (n=18) .....         | 15 |

## Supplementary file 1: Search strategy

### Grid of key concepts and terms

|                        |    |                        |     |                          |
|------------------------|----|------------------------|-----|--------------------------|
| <b>Concept 1</b>       |    | <b>Concept 2</b>       |     | <b>Concept 3</b>         |
| Adverse birth outcomes | OR | Pregnancy risk factors | AND | Pacific Island countries |

### CINAHL searches for key concept terms and terms

| Key concept terms      | CINAHL Mesh and subject headings identified                                                                          |
|------------------------|----------------------------------------------------------------------------------------------------------------------|
| Adverse birth outcomes | MH "Pregnancy outcome*" OR MH "Infant very Low birth weight" OR MH "Outcome* of prematurity"                         |
| Pregnancy risk factors | MH "Risk factor*" OR MH "Pregnancy risk" OR MH "High risk*" OR MH "Pregnancy in adolescence" OR MH "Pregnancy risk*" |
| Pacific Island region  | MH "Pacific Island*"                                                                                                 |

### Search strings developed

|                                                                                                                                                                                                                                                                                                                                                                                                                                                                                                                                                                                                                                                                                                                                                                                                                                                                                                                                                                                                                                                                                                                                                                                                                                                                |
|----------------------------------------------------------------------------------------------------------------------------------------------------------------------------------------------------------------------------------------------------------------------------------------------------------------------------------------------------------------------------------------------------------------------------------------------------------------------------------------------------------------------------------------------------------------------------------------------------------------------------------------------------------------------------------------------------------------------------------------------------------------------------------------------------------------------------------------------------------------------------------------------------------------------------------------------------------------------------------------------------------------------------------------------------------------------------------------------------------------------------------------------------------------------------------------------------------------------------------------------------------------|
| <p><b>Key concept and general terms and synonyms search string</b><br/>           ("adverse birth outcome*" OR "poor birth outcome*" OR "preterm birth*" OR "premature birth*" OR "Poor fetal growth*" OR "fetal growth restriction*" OR "intrauterine growth retardation" OR "growth retardation" OR "low birth weight" OR "low birth weight " OR "very low birth weight" OR "very low birth weight " OR "extremely low birth weight" OR "extremely low birth weight " OR "stillbirth" OR "still birth") AND ("pregnancy risk factor*" OR "adverse pregnancy outcome*" OR "poor pregnancy outcome*") AND ("Pacific Island*" OR "Oceania" OR "South Pacific Island*" OR "Pacific Island country*")</p>                                                                                                                                                                                                                                                                                                                                                                                                                                                                                                                                                         |
| <p><b>MeSH terms search string</b><br/>           (MH "pregnancy outcome*" OR MH "infant very low birth weight" OR MH "outcome* of prematurity") AND (MH "risk factor*" OR MH "pregnancy risk*" OR MH "high risk*" OR MH "pregnancy in adolescence*" OR MH "pregnancy risk*") AND ("MH Pacific Island*")</p>                                                                                                                                                                                                                                                                                                                                                                                                                                                                                                                                                                                                                                                                                                                                                                                                                                                                                                                                                   |
| <p><b>General and MeSH terms combined search string</b><br/>           ("adverse birth outcome*" OR "poor birth outcome*" OR "preterm birth*" OR "premature birth*" OR "Poor fetal growth*" OR "fetal growth restriction*" OR "intrauterine growth retardation" OR "growth retardation" OR "small baby*" OR "very small baby*" OR "low birth weight" OR "low birth weight " OR "very low birth weight" OR "very low birth weight " OR "extremely low birth weight" OR "extremely low birth weight " OR "stillbirth" OR "still birth" OR MH "pregnancy outcome*" OR MH "infant very low birth weight" OR MH "outcome* of prematurity") AND ("pregnancy risk factor*" OR "adverse pregnancy outcome*" OR "poor pregnancy outcome*" OR MH "risk factor*" OR MH "pregnancy risk*" OR MH "high risk*" OR MH "pregnancy in adolescence*" OR MH "pregnancy risk*") AND ("Pacific Island*" OR "Oceania" OR "South Pacific Island*" OR "Pacific Island country*" OR "MH Pacific Island*")</p>                                                                                                                                                                                                                                                                           |
| <p><b>Specific and MeSH terms combined search string</b><br/>           ("preterm birth*" OR "premature birth*" OR "Poor fetal growth*" OR "fetal growth restriction*" OR "intrauterine growth retardation" OR "growth retardation" OR "small baby*" OR "very small baby*" OR "low birth weight" OR "low birth weight " OR "very low birth weight" OR "very low birth weight " OR "extremely low birth weight" OR "extremely low birth weight " OR "stillbirth" OR "still birth" OR MH "pregnancy outcome*" OR MH "infant very low birth weight" OR MH "outcome* of prematurity") AND ("malaria in pregnancy" OR "anaemia in pregnancy" OR "substance use" OR "alcohol use" OR "betel nut use" OR "areca nut use" OR "tobacco use" OR "cigarette use" OR "maternal obesity" OR "maternal malnutrition" OR "maternal undernutrition" OR "teenage pregnancy") AND ("American Samoa" OR "Cook Island*" OR "Easter Island*" OR "Federated States of Micronesia" OR "Fiji" OR "Guam" OR "Kiribati" OR "Mariana Island*" OR "Marshall Island*" OR "Nauru" OR "New Caledonia" OR "Niue" OR "Palau" OR "Papua New Guinea" OR "Samoa" OR "Solomon Island*" OR "Tahiti" OR "Tokelau" OR "Tonga" OR "Tuvalu" OR "Vanuatu" OR "Wallis and Futuna") Filter/limiter used</p> |
| <p><b>Filter/Limiter used</b><br/>           -Year inclusion 2000-1<sup>st</sup> January-28<sup>th</sup> 2021<br/>           -Full text articles<br/>           -English Language</p>                                                                                                                                                                                                                                                                                                                                                                                                                                                                                                                                                                                                                                                                                                                                                                                                                                                                                                                                                                                                                                                                          |

**Abbreviation used. MS:** Medical subject heading or MeSH term

## Supplementary file 2: Data extraction table

|                                                                                    |
|------------------------------------------------------------------------------------|
| <b>Main category</b>                                                               |
| a. Author(s)                                                                       |
| b. Year of publication                                                             |
| c. Origin/country study was conducted                                              |
| d. Study design                                                                    |
| e. Aims/purpose.                                                                   |
| f. Sampling strategy                                                               |
| g. Study population                                                                |
| h. Sample size                                                                     |
| i. Methodology                                                                     |
| j. Intervention/exposure type (if applicable) and comparison group (if applicable) |
| k. Duration of the exposure/intervention (if applicable)                           |
| l. Outcome assessment and method to assess associations (if applicable)            |
| m. Key findings that relate to the scoping review question(s)                      |

### Supplementary File 3: Prevalence of adverse birth outcome

| Countries                          | Sources                                   | Adverse birth outcome prevalence | Effect size 95% |
|------------------------------------|-------------------------------------------|----------------------------------|-----------------|
| <b>Low birth weight</b>            |                                           |                                  |                 |
| PNG                                | Peters, Vince <sup>50</sup>               | 8%                               | (7%, 11%)       |
|                                    | Stanisic, Moore <sup>52</sup>             | 17%                              | (14%, 28%)      |
|                                    | Unger, Ome-Kaius <sup>53</sup>            | 16%                              | (14%, 23%)      |
|                                    | Ome-Kaius, Unger <sup>49</sup>            | 14%                              | (14%, 19%)      |
|                                    | Lufele, Umbers <sup>48</sup>              | 14%                              | (14%, 19%)      |
|                                    | Fowkes, Davidson <sup>47</sup>            | 17%                              | (14%, 29%)      |
|                                    | Unger, Rosanas-Urgell <sup>54</sup>       | 15%                              | (16%, 20%)      |
|                                    | National Statistics Office <sup>21</sup>  | 14%                              | (15%, 18%)      |
| Vanuatu                            | Ministry of Health <sup>59</sup>          | 11%                              | (10%, 15%)      |
| Solomon Islands                    | Cafaro, Randle <sup>45</sup>              | 12%                              | (11%, 17%)      |
|                                    | National Statistic Office <sup>61</sup>   | 10%                              | (10%, 13%)      |
| Tonga                              | Ministry of Health <sup>20</sup>          | 4%                               | (3%, 5%)        |
| Samoa                              | Bureau of Statistics <sup>19</sup>        | 5%                               | (4%, 6%)        |
| Tuvalu                             | Central Statistics Division <sup>57</sup> | 6%                               | (4%, 10%)       |
| CNMI                               | Cruz, Grant <sup>46,55</sup>              | 3%                               | (3%, 4%)        |
| Palau                              | Berger, Masterson <sup>44</sup>           | 8%                               | (7%, 11%)       |
| Kiribati                           | National Statistic Office <sup>60</sup>   | 13%                              | (11%, 17%)      |
| Marshall Is.                       | Economic Policy <sup>58</sup>             | 18%                              | (18%, 26%)      |
| Nauru                              | Bureau of Statistics <sup>55</sup>        | 27%                              | (27%, 50%)      |
| <b>Preterm birth</b>               |                                           |                                  |                 |
| PNG                                | Stanisic, Moore <sup>52</sup>             | 22%                              | (20%, 39%)      |
|                                    | Fowkes, Davidson <sup>47</sup>            | 22%                              | (20%, 40%)      |
|                                    | Unger, Rosanas-Urgell <sup>54</sup>       | 9 %                              | (8%, 13%)       |
| Solomon Islands                    | Cafaro, Randle <sup>45</sup>              | 24%                              | (26%, 36%)      |
| CNMI                               | Cruz, Grant <sup>46</sup>                 | 7 %                              | (6%, 8%)        |
| Palau                              | Berger, Masterson <sup>44</sup>           | 9%                               | (8%, 12%)       |
| <b>Preterm low birth weight</b>    |                                           |                                  |                 |
| Palau                              | Berger, Masterson <sup>44</sup>           | 5%                               | (4%, 5%)        |
| <b>Term low birth weight</b>       |                                           |                                  |                 |
|                                    | Berger, Masterson <sup>44</sup>           | 4%                               | (3%, 5%)        |
| <b>Preterm normal weight</b>       |                                           |                                  |                 |
| Palau                              | Berger, Masterson <sup>44</sup>           | 4%                               | (3%, 6%)        |
| <b>Small for gestational age</b>   |                                           |                                  |                 |
| PNG                                | Unger, Rosanas-Urgell <sup>54</sup>       | 2%                               | (1%, 3%)        |
| <b>Smaller than average babies</b> |                                           |                                  |                 |
| PNG                                | National Statistics Office <sup>21</sup>  | 19%                              | (21%, 25%)      |
| Solomon Islands                    | National Statistic Office <sup>61</sup>   | 11%                              | (11%, 14%)      |
| Samoa                              | Bureau of Statistics <sup>19</sup>        | 11%                              | (11%, 14%)      |
| Tuvalu                             | Central Statistics Division <sup>57</sup> | 11%                              | (9%, 17%)       |
| Kiribati                           | National Statistic Office <sup>60</sup>   | 5%                               | (4%, 7%)        |
| Marshall Islands                   | Economic Policy <sup>58</sup>             | 18%                              | (18%, 26%)      |
| <b>Very small babies</b>           |                                           |                                  |                 |
| Solomon                            | National Statistic Office <sup>61</sup>   | 3%                               | (3%, 4%)        |
| Tonga                              | Ministry of Health <sup>20</sup>          | 5%                               | (4%, 7%)        |
| Samoa                              | Bureau of Statistics <sup>19</sup>        | 1%                               | (0%, 1%)        |
| Tuvalu                             | Central Statistics Division <sup>57</sup> | 3%                               | (2%, 5%)        |
| Kiribati                           | National Statistic Office <sup>60</sup>   | 2%                               | (1%, 3%)        |
| Marshall Islands                   | Economic Policy <sup>58</sup>             | 5%                               | (4%, 7%)        |
| Nauru                              | Bureau of Statistics <sup>55</sup>        | 22%                              | (21%, 39%)      |

**Supplementary File 4:** Preferred reporting items for systematic reviews and meta-analyses extension for scoping reviews (PRISMA-ScR) checklist

| SECTION                          | ITEM | PRISMA-ScR CHECKLIST ITEM                                                                                                                                                                                                                                                                                  | REPORTED ON PAGE #                                                                                      |
|----------------------------------|------|------------------------------------------------------------------------------------------------------------------------------------------------------------------------------------------------------------------------------------------------------------------------------------------------------------|---------------------------------------------------------------------------------------------------------|
| <b>TITLE</b>                     |      |                                                                                                                                                                                                                                                                                                            |                                                                                                         |
| Title                            | 1    | Identify the report as a scoping review.                                                                                                                                                                                                                                                                   | 1                                                                                                       |
| <b>ABSTRACT</b>                  |      |                                                                                                                                                                                                                                                                                                            |                                                                                                         |
| Structured summary               | 2    | Provide a structured summary that includes (as applicable): background, objectives, eligibility criteria, sources of evidence, charting methods, results, and conclusions that relate to the review questions and objectives.                                                                              | 2                                                                                                       |
| <b>INTRODUCTION</b>              |      |                                                                                                                                                                                                                                                                                                            |                                                                                                         |
| Rationale                        | 3    | Describe the rationale for the review in the context of what is already known. Explain why the review questions/objectives lend themselves to a scoping review approach.                                                                                                                                   | 4                                                                                                       |
| Objectives                       | 4    | Provide an explicit statement of the questions and objectives being addressed with reference to their key elements (e.g., population or participants, concepts, and context) or other relevant key elements used to conceptualize the review questions and/or objectives.                                  | 4                                                                                                       |
| <b>METHODS</b>                   |      |                                                                                                                                                                                                                                                                                                            |                                                                                                         |
| Protocol and registration        | 5    | Indicate whether a review protocol exists; state if and where it can be accessed (e.g., a Web address); and if available, provide registration information, including the registration number.                                                                                                             | <a href="https://bmjopen.bmj.com/content/11/4/e042423">https://bmjopen.bmj.com/content/11/4/e042423</a> |
| Eligibility criteria             | 6    | Specify characteristics of the sources of evidence used as eligibility criteria (e.g., years considered, language, and publication status), and provide a rationale.                                                                                                                                       | 4<br>Detailed in protocol inclusion and exclusion criteria"                                             |
| Information sources              | 7    | Describe all information sources in the search (e.g., databases with dates of coverage and contact with authors to identify additional sources), as well as the date the most recent search was executed.                                                                                                  | 5                                                                                                       |
| Search                           | 8    | Present the full electronic search strategy for at least 1 database, including any limits used, such that it could be repeated.                                                                                                                                                                            | Outlined in page 5<br>More detail in Supplementary file 1                                               |
| Selection of sources of evidence | 9    | State the process for selecting sources of evidence (i.e., screening and eligibility) included in the scoping review.                                                                                                                                                                                      | 6<br>Figure 1 PRISMA flow diagram                                                                       |
| Data charting process            | 10   | Describe the methods of charting data from the included sources of evidence (e.g., calibrated forms or forms that have been tested by the team before their use, and whether data charting was done independently or in duplicate) and any processes for obtaining and confirming data from investigators. | 5                                                                                                       |
| Data items                       | 11   | List and define all variables for which data were sought and any assumptions and simplifications made.                                                                                                                                                                                                     | Table 1 summary of studies                                                                              |

|                                                      |    |                                                                                                                                                                                                       |                                                        |
|------------------------------------------------------|----|-------------------------------------------------------------------------------------------------------------------------------------------------------------------------------------------------------|--------------------------------------------------------|
| Critical appraisal of individual sources of evidence | 12 | If done, provide a rationale for conducting a critical appraisal of included sources of evidence; describe the methods used and how this information was used in any data synthesis (if appropriate). | Not applicable                                         |
| Synthesis of results                                 | 13 | Describe the methods of handling and summarizing the data that were charted.                                                                                                                          | 5                                                      |
| <b>RESULTS</b>                                       |    |                                                                                                                                                                                                       |                                                        |
| Selection of sources of evidence                     | 14 | Give numbers of sources of evidence screened, assessed for eligibility, and included in the review, with reasons for exclusions at each stage, ideally using a flow diagram.                          | 6, Figure 1 PRISMA flow diagram                        |
| Characteristics of sources of evidence               | 15 | For each source of evidence, present characteristics for which data were charted and provide the citations.                                                                                           | 6-7, supplementary 5 and 6 presenting effect estimates |
| Critical appraisal within sources of evidence        | 16 | If done, present data on critical appraisal of included sources of evidence (see item 12).                                                                                                            | Not applicable                                         |
| Results of individual sources of evidence            | 17 | For each included source of evidence, present the relevant data that were charted that relate to the review questions and objectives.                                                                 | 6-7, supplementary 5 and 6 presenting effect estimates |
| Synthesis of results                                 | 18 | Summarize and/or present the charting results as they relate to the review questions and objectives.                                                                                                  | 6-7, supplementary 4 and 5 presenting effect estimates |
| <b>DISCUSSION</b>                                    |    |                                                                                                                                                                                                       |                                                        |
| Summary of evidence                                  | 19 | Summarize the main results (including an overview of concepts, themes, and types of evidence available), link to the review questions and objectives, and consider the relevance to key groups.       | 6-7                                                    |
| Limitations                                          | 20 | Discuss the limitations of the scoping review process.                                                                                                                                                | 11                                                     |
| Conclusions                                          | 21 | Provide a general interpretation of the results with respect to the review questions and objectives, as well as potential implications and/or next steps.                                             | 11                                                     |
| <b>FUNDING</b>                                       |    |                                                                                                                                                                                                       |                                                        |
| Funding                                              | 22 | Describe sources of funding for the included sources of evidence, as well as sources of funding for the scoping review. Describe the role of the funders of the scoping review.                       | 11                                                     |

**Retrieved from:** Tricco AC, Lillie E, Zarin W, O'Brien KK, Colquhoun H, Levac D, et al. PRISMA Extension for Scoping Reviews (PRISMA-ScR): Checklist and Explanation. *Ann Intern Med.* 2018;169:467–473. doi: 10.7326/M18-0850.

**Supplementary file 5.** Health, demographic and social risk factors associated with low birth weight

| <b>AUTHORS</b>                      | <b>EXPOSURES COMPARISON</b>                             | <b>EFFECT ESTIMATE (95%, confidence interval)</b> |
|-------------------------------------|---------------------------------------------------------|---------------------------------------------------|
| Lufele, Umbers <sup>48</sup>        | <b>Placenta malaria infection</b>                       |                                                   |
|                                     | No                                                      | <b>Reference</b>                                  |
|                                     | Acute                                                   | aOR 2.00 (0.89, 3.95)                             |
|                                     | Chronic                                                 | aOR 1.2 (0.59, 2.50)                              |
| Stanisic, Moore <sup>52</sup>       | Past                                                    | aOR 1.0 (0.61, 1.63)                              |
|                                     | <b>Placenta malaria infection</b>                       |                                                   |
|                                     | No                                                      | <b>Reference</b>                                  |
|                                     | Chronic                                                 | aOR 3.3 (1.0, 10.60)                              |
|                                     | Acute                                                   | aOR 0.7 (0.22, 2.0)                               |
|                                     | Past                                                    | aOR 1.5 (0.37, 6.10)                              |
|                                     | <b>Sub-microscopic malaria infection</b>                |                                                   |
| Negative                            | <b>Reference</b>                                        |                                                   |
| Positive                            | aOR 2.4 (0.99, 5.89)                                    |                                                   |
| Unger, Rosanas-Urgell <sup>54</sup> | <b>Plasmodium falciparum malaria infection</b>          |                                                   |
|                                     | No                                                      | <b>Reference</b>                                  |
|                                     | Sub-microscopic                                         | aOR 1.0 (0.55, 1.84)                              |
|                                     | Microscopic                                             | aOR 1.0 (0.54, 1.75)                              |
|                                     | <b>Plasmodium falciparum malaria (peripheral blood)</b> |                                                   |
|                                     | No                                                      | <b>Reference</b>                                  |
|                                     | Sub-microscopic                                         | aOR 1.0 (0.35, 2.83)                              |
|                                     | Microscopic                                             | aOR 2.8 (1.27, 5.94)                              |
|                                     | <b>P.falciparum malaria (placenta blood)</b>            |                                                   |
|                                     | No                                                      | <b>Reference</b>                                  |
| Sub-microscopic                     | aOR 2.9 (0.82, 9.91)                                    |                                                   |
| Microscopic                         | aOR 2.1 (0.87, 4.98)                                    |                                                   |
| Stanisic, Moore <sup>52</sup>       | <b>Clinical history of infection</b>                    |                                                   |
|                                     | No                                                      | <b>Reference</b>                                  |
|                                     | Yes                                                     | aOR 1.0 (0.42, 1.90)                              |
|                                     | <b>Maternal parasitaemia (enrolment)</b>                |                                                   |
|                                     | No                                                      | <b>Reference</b>                                  |
| Yes                                 | aOR 1.0 (0.50, 2.20)                                    |                                                   |
| Berger, Masterson <sup>44</sup>     | <b>Betel nut users with tobacco use</b>                 |                                                   |
|                                     | No                                                      | <b>Reference</b>                                  |
|                                     | Yes                                                     | aOR 2.4 (1.0, 6.0)                                |
| Senn, Baiwog <sup>51</sup>          | <b>Betel nut users</b>                                  |                                                   |
|                                     | No                                                      | <b>Reference</b>                                  |
|                                     | Yes                                                     | OR 1.9 (0.4, 17.0)                                |
|                                     | <b>Betel nut users (term LBW)</b>                       |                                                   |
|                                     | No                                                      | <b>Reference</b>                                  |
| Yes                                 | OR 3.0 (0.4, 13.0)                                      |                                                   |
| Peters, Vince <sup>50</sup>         | <b>Maternal tobacco users</b>                           |                                                   |
|                                     | No                                                      | <b>Reference</b>                                  |
|                                     | Yes                                                     | OR 2.9 (1.28, 6.32)                               |
| Stanisic, Moore <sup>52</sup>       | <b>Maternal tobacco users</b>                           |                                                   |
|                                     | No                                                      | <b>Reference</b>                                  |
|                                     | Yes                                                     | aOR 1.4 (0.62, 3.35)                              |
| Fowkes, Davidson <sup>47</sup>      | <b>Iron deficiency and gravidity</b>                    |                                                   |
|                                     | Primigravida                                            | aOR 0.3 (0.10, 0.66)                              |
|                                     | Multigravida                                            | <b>Reference</b>                                  |
|                                     | <b>Southeast Asian ovalocytosis</b>                     |                                                   |
|                                     | Normal                                                  | <b>Reference</b>                                  |

|                                 |                                          |                      |
|---------------------------------|------------------------------------------|----------------------|
| Stanisic, Moore <sup>52</sup>   | Infected                                 | aOR 2.3 (0.94, 5.75) |
|                                 | <b>Alpha thalassaemia infection</b>      |                      |
|                                 | Wildtype                                 | <b>Reference</b>     |
|                                 | Heterozygote                             | aOR 0.7 (0.27, 1.58) |
|                                 | Homozygote                               | aOR 0.6 (0.22, 1.34) |
|                                 | <b>Maternal anaemia (Hb &lt;8 g/dL)</b>  |                      |
|                                 | No                                       | <b>Reference</b>     |
| Yes                             | OR 1.0 (0.52, 1.80)                      |                      |
| Ome-Kaius, Unger <sup>49</sup>  | <b>Maternal height (&lt;150cm)</b>       |                      |
|                                 | No                                       | <b>Reference</b>     |
|                                 | Yes                                      | aOR 1.7 (1.22, 2.41) |
|                                 | <b>Maternal MUAC (&lt;23 cm)</b>         |                      |
|                                 | Yes                                      | aOR 1.5 (1.10, 2.03) |
| Peters, Vince <sup>50</sup>     | <b>Maternal age (years)</b>              |                      |
|                                 | 22-35                                    | <b>Reference</b>     |
|                                 | < 22 years and >35                       | OR 1.9 (1.04, 3.56)  |
| Berger, Masterson <sup>44</sup> | <b>Body mass index (kgm<sup>3</sup>)</b> |                      |
|                                 | <30 kgm <sup>3</sup>                     | <b>Reference</b>     |
|                                 | ≥30 kgm <sup>3</sup>                     | aOR 0.6 (0.3, 1.4)   |
| Peters, Vince <sup>50</sup>     | <b>Birth intervals (years)</b>           |                      |
|                                 | > 2 years                                | <b>Reference</b>     |
|                                 | <2 years                                 | OR 3.6 (1.39, 9.30)  |
|                                 | <b>Antenatal booking</b>                 |                      |
|                                 | Booked                                   | <b>Reference</b>     |
|                                 | Unbooked                                 | aOR 4.0 (2.12, 7.57) |
|                                 | <b>Antenatal visits</b>                  |                      |
|                                 | ≥3 visits                                | <b>Reference</b>     |
|                                 | <3 visits                                | OR 2.9 (1.36, 6.14)  |
|                                 | <b>Fever during pregnancy</b>            |                      |
| No                              | <b>Reference</b>                         |                      |
| Yes                             | OR 2.8 (0.87, 8.83)                      |                      |
| Ome-Kaius, Unger <sup>49</sup>  | <b>Female infants</b>                    |                      |
|                                 | Yes                                      | <b>Reference</b>     |
|                                 | No                                       | OR 1.6 (1.22, 2.22)  |
|                                 | <b>Primigravida</b>                      |                      |
|                                 | No                                       | <b>Reference</b>     |
|                                 | Yes                                      | aOR 2.9 (2.13, 3.96) |
|                                 | <b>Number of antenatal visits</b>        |                      |
| ≥3 visits                       | <b>Reference</b>                         |                      |
| 1-2 visits                      | aOR 0.7 (0.46, 0.92)                     |                      |
| Stanisic, Moore <sup>52</sup>   | <b>Gravidity</b>                         |                      |
|                                 | Primigravida                             | <b>Reference</b>     |
|                                 | Multigravida                             | aOR 0.3 (0.13, 0.57) |
| Ome-Kaius, Unger <sup>49</sup>  | <b>Malaria prophylaxis (SPAZ-IPTp)</b>   |                      |
|                                 | Yes                                      | <b>Reference</b>     |
|                                 | No                                       | aOR 0.6 (0.48, 0.85) |
|                                 | <b>PNG highlands mothers</b>             |                      |
|                                 | Yes                                      | <b>Reference</b>     |
| No                              | aOR 0.3 (0.14, 0.80)                     |                      |
| Stanisic, Moore <sup>52</sup>   | <b>Maternal education status</b>         |                      |
|                                 | No                                       | <b>Reference</b>     |
|                                 | Primary                                  | aOR 0.5 (0.13, 1.70) |
|                                 | Secondary                                | aOR 0.6 (0.16, 2.0)  |

**Abbreviation and notes.** aOR: adjusted odds ratio, cm: centimetre, g/dL: gram per decilitre, kgm<sup>3</sup>: kilogram per cubic metre, SPAZ-IPTp: sulphadoxine-pyrimethamine and azithromycin, Odds ratio rounded to the nearest one decimal place



**Supplementary file 6.** Health, demographic and social risk factors associated with preterm births

| <b>AUTHORS</b>                      | <b>EXPOSURES COMPARISON</b>                             | <b>EFFECT ESTIMATE (95%, confidence interval )</b> |
|-------------------------------------|---------------------------------------------------------|----------------------------------------------------|
| Lufele, Umbers <sup>48</sup>        | <b>Placenta malaria infection</b>                       |                                                    |
|                                     | No                                                      | <b>Reference</b>                                   |
|                                     | Acute                                                   | aOR 2.3 (0.86, 6.35)                               |
|                                     | Chronic                                                 | aOR 3.9 (1.64, 9.38)                               |
| Stanisic, Moore <sup>52</sup>       | <b>Placenta malaria infection</b>                       |                                                    |
|                                     | No                                                      | <b>Reference</b>                                   |
|                                     | Acute                                                   | aOR 2.1 (0.75, 5.80)                               |
|                                     | Chronic                                                 | aOR 4.2 (1.30, 13.40)                              |
| Unger, Rosanas-Urgell <sup>54</sup> | <b>Plasmodium falciparum malaria infection</b>          |                                                    |
|                                     | No                                                      | <b>Reference</b>                                   |
|                                     | Sub-microscopic                                         | aOR 0.2 (0.02, 1.26)                               |
|                                     | Microscopic                                             | aOR 1.2 (0.49, 1.26)                               |
|                                     | <b>Plasmodium falciparum malaria (peripheral blood)</b> |                                                    |
|                                     | No                                                      | <b>Reference</b>                                   |
|                                     | Sub-microscopic                                         | aOR 0.5 (0.07, 4.29)                               |
|                                     | Microscopic                                             | aOR 6.6 (2.46, 17.62)                              |
|                                     | <b>Plasmodium falciparum malaria (placenta blood)</b>   |                                                    |
|                                     | No                                                      | <b>Reference</b>                                   |
|                                     | Sub-microscopic                                         | aOR 3.3 (0.66, 16.83)                              |
|                                     | Microscopic                                             | aOR 3.0 (0.87, 10.30)                              |
| Stanisic, Moore <sup>52</sup>       | <b>Tobacco smoke users</b>                              |                                                    |
|                                     | No                                                      | <b>Reference</b>                                   |
|                                     | Yes                                                     | aOR 1.1 (0.50, 2.62)                               |
| Berger, Masterson <sup>44</sup>     | <b>Betel nut and tobacco smoke users</b>                |                                                    |
|                                     | No                                                      | <b>Reference</b>                                   |
|                                     | Yes                                                     | aOR 1.0 (0.6, 1.70)                                |
| Senn, Baiwog <sup>51</sup>          | <b>Betel nut users</b>                                  |                                                    |
|                                     | No                                                      | <b>Reference</b>                                   |
|                                     | Yes                                                     | OR 0.6 (0.1, 5.4)                                  |
| Ome-Kaius, Unger <sup>49</sup>      | <b>Betel nut users</b>                                  |                                                    |
|                                     | No                                                      | <b>Reference</b>                                   |
|                                     | Yes                                                     | OR 0.9 (0.65, 1.38)                                |
| Stanisic, Moore <sup>52</sup>       | <b>Southeast Asian ovalocytosis infection</b>           |                                                    |
|                                     | No                                                      | <b>Reference</b>                                   |
|                                     | Yes                                                     | aOR 1.1 (0.40, 2.99)                               |
|                                     | <b>Alpha thalassaemia infection</b>                     |                                                    |
|                                     | Wildtype                                                | <b>Reference</b>                                   |
|                                     | Heterozygote                                            | aOR 0.9 (0.38, 2.23)                               |
| Homozygote                          | aOR 0.6 (0.25, 1.56)                                    |                                                    |
| Berger, Masterson <sup>44</sup>     | <b>Body mass index (kgm3)</b>                           |                                                    |
|                                     | <30 kgm3                                                | <b>Reference</b>                                   |
|                                     | ≥30 kgm3                                                | aOR 1.5 (1.0, 2.3)                                 |
| Cruz, Grant <sup>46</sup>           | <b>Maternal age (years)</b>                             |                                                    |
|                                     | 20-34 years                                             | <b>Reference</b>                                   |
|                                     | <20 years                                               | aOR 1.3 (1.0, 1.80)                                |
|                                     | ≥35 years                                               | aOR 1.5 (1.20, 1.9)                                |
|                                     | <b>Number of antenatal visits</b>                       |                                                    |
|                                     | ≥9 visits                                               | <b>Reference</b>                                   |
| 0 visit                             | aOR 3.9 (2.90, 5.3)                                     |                                                    |

|                               |                                          |                      |
|-------------------------------|------------------------------------------|----------------------|
|                               | 1-8 visits                               | aOR 2.8 (2.10, 3.7)  |
| Stanisic, Moore <sup>52</sup> | <b>Gravidity</b>                         |                      |
|                               | Primigravida                             | <b>Reference</b>     |
|                               | Multigravida                             | aOR 0.4 (0.19, 0.79) |
|                               | <b>Used of bed nets during pregnancy</b> |                      |
|                               | No                                       | <b>Reference</b>     |
|                               | Yes                                      | aOR 0.8 (0.36, 1.7)  |
| Cruz, Grant <sup>46</sup>     | <b>Maternal race/ethnicity</b>           |                      |
|                               | Chinese women                            | <b>Reference</b>     |
|                               | CNMI women                               | aOR 2.7 (2.0, 3.6)   |
|                               | Pacific Island women                     | aOR 2.9 (2.1, 4.1)   |
|                               | Filipino                                 | aOR 2.3 (1.7, 3.1)   |
|                               | Another non-Pacific Islander             | aOR 1.1 (0.7, 1.7)   |
| Stanisic, Moore <sup>52</sup> | <b>Maternal education status</b>         |                      |
|                               | No                                       | <b>Reference</b>     |
|                               | Primary                                  | aOR 0.2 (0.07, 0.66) |
|                               | Secondary                                | aOR 0.1 (0.04, 0.42) |

**Abbreviation and notes.** aOR: adjusted odds ratio, kgm3: kilogram per cubic metre, OR: odds ratio, Odds ratio rounded to the nearest one decimal place

**Supplementary file 7.** Health, demographic and social risk factors associated with small for gestational age

| <b>AUTHORS</b>                         | <b>EXPOSURES COMPARISON</b>                             | <b>EFFECT ESTIMATE (95%, confidence interval)</b> |
|----------------------------------------|---------------------------------------------------------|---------------------------------------------------|
| Lufele, Umbers <sup>48</sup>           | <b>Placenta malaria infection</b>                       |                                                   |
|                                        | No                                                      | <b>Reference</b>                                  |
|                                        | Acute                                                   | aOR -0.7 (-5.02, 3.71)                            |
|                                        | Chronic                                                 | aOR -3.4 (-7.79, 1.02)                            |
| Unger, Rosanas-Urgell <sup>54</sup>    | <b>Plasmodium falciparum malaria</b>                    |                                                   |
|                                        | No                                                      | <b>Reference</b>                                  |
|                                        | Sub-microscopic                                         | aOR 1.7 (0.93, 2.92)                              |
|                                        | Microscopic                                             | aOR 0.7 (0.35, 1.43)                              |
|                                        | <b>Plasmodium falciparum malaria (peripheral blood)</b> |                                                   |
|                                        | No                                                      | <b>Reference</b>                                  |
|                                        | Sub-microscopic                                         | aOR 1.3 (0.44, 3.96)                              |
|                                        | Microscopic                                             | aOR 1.7 (0.67, 4.39)                              |
|                                        | <b>Plasmodium Falciparum malaria (placenta blood )</b>  |                                                   |
|                                        | No                                                      | <b>Reference</b>                                  |
|                                        | Sub-microscopic                                         | aOR 2.6 (0.71, 9.56)                              |
|                                        | Microscopic                                             | aOR 1.6 (0.61, 4.34)                              |
| Unger, Ome-Kaius <sup>53</sup>         | <b>Malaria infection</b>                                |                                                   |
|                                        | No                                                      | <b>Reference</b>                                  |
|                                        | Yes                                                     | aRR 1.1 (0.91, 1.36)                              |
|                                        | <b>Maternal recent infection (weeks)</b>                |                                                   |
|                                        | >6                                                      | <b>Reference</b>                                  |
|                                        | <6                                                      | aRR 1.0 (0.81, 1.32)                              |
|                                        | <b>Maternal infection</b>                               |                                                   |
|                                        | 1 infection                                             | <b>Reference</b>                                  |
|                                        | ≥2 infection                                            | aRR 1.2 (0.85, 1.63)                              |
|                                        | <b>Betel nut chewing</b>                                |                                                   |
|                                        | No                                                      | <b>Reference</b>                                  |
|                                        | Yes                                                     | aRR 0.9 (0.72, 1.09)                              |
|                                        | <b>Tobacco smoke</b>                                    |                                                   |
|                                        | No                                                      | <b>Reference</b>                                  |
|                                        | Yes                                                     | aRR 1.0 (0.79, 1.22)                              |
|                                        | <b>Anaemia at enrolment (mg/L)</b>                      |                                                   |
|                                        | Hb<90                                                   | aRR 1.3 (1.06, 1.51)                              |
|                                        | Hb>90                                                   | <b>Reference</b>                                  |
|                                        | <b>Mid upper arm circumference (cm)</b>                 |                                                   |
|                                        | >22                                                     | <b>Reference</b>                                  |
|                                        | <22                                                     | aRR 1.5 (1.29, 1.76)                              |
|                                        | <b>Maternal height (cm)</b>                             |                                                   |
|                                        | >150                                                    | <b>Reference</b>                                  |
|                                        | <150                                                    | aRR 1.3 (1.04, 1.55)                              |
|                                        | <b>Maternal body mass index (kg/m3)</b>                 |                                                   |
|                                        | >18.5                                                   | <b>Reference</b>                                  |
|                                        | <18.5                                                   | aRR 1.3 (0.95, 1.80)                              |
|                                        | <b>Gravidity</b>                                        |                                                   |
|                                        | Multigravida                                            | <b>Reference</b>                                  |
|                                        | Primigravida                                            | RR 1.4 (1.13, 1.61)                               |
| <b>Recent IPTp malaria prophylaxis</b> |                                                         |                                                   |
| No                                     | <b>Reference</b>                                        |                                                   |
| Yes                                    | aRR 0.2 (0.04, 0.27)                                    |                                                   |
| <b>Maternal ethnicity</b>              |                                                         |                                                   |

|                                         |                                   |                      |
|-----------------------------------------|-----------------------------------|----------------------|
|                                         | Madang/Morobe                     | <b>Reference</b>     |
|                                         | Other                             | RR 0.8 (0.70, 1.02)  |
|                                         | <b>Literate mother</b>            |                      |
|                                         | No                                | <b>Reference</b>     |
|                                         | Yes                               | RR 1.1 (0.81, 1.49)  |
|                                         | <b>Mother generating income</b>   |                      |
|                                         | No                                | <b>Reference</b>     |
|                                         | Yes                               | RR 1.0 (0.87, 1.24)  |
|                                         | <b>Partner generating income</b>  |                      |
|                                         | No                                | <b>Reference</b>     |
|                                         | Yes                               | RR 0.9 (0.73, 1.02)  |
|                                         | <b>Maternal area of residence</b> |                      |
|                                         | Urban area                        | <b>Reference</b>     |
|                                         | Peri-urban area                   | RR 1.2 (0.87, 1.52)  |
|                                         | Rural area                        | RR 1.1 (0.83, 1.37)  |
| <b>Stillbirth and miscarriage risks</b> |                                   |                      |
|                                         | <b>Betel nut chewing mothers</b>  |                      |
| Ome-Kaius, et al. 6                     | Non-users                         | <b>Reference</b>     |
|                                         | Heavy users                       | RR 1.8 (0.63, 2.97)* |
|                                         | <b>Malaria Infection</b>          |                      |
|                                         | No infection                      | <b>Reference</b>     |
| Unger, Rosanas-Urgell<br>54             | Submicroscopic infection          | aOR 0.8 (0.19, 3.41) |
|                                         | Microscopic infection             | aOR 2.0 (0.68, 5.66) |

**Abbreviation and notes.** aOR: adjusted odds ratio, aRR: adjusted relative risks, cm: centimetre, Hb: haemoglobin, kg/m: kilogram per cubic metre, mg/L: milligram per litre, RR: relative risk, \* RR and CI recalculated, Odds ratio rounded to the nearest one decimal place

**Supplementary file 8.** Health, demographic and social risk factors associated with changes in mean birth weight

| <b>AUTHORS</b>                 | <b>EXPOSURES COMPARISON</b>                                   | <b>EFFECT ESTIMATE (95%, confidence interval)</b> |
|--------------------------------|---------------------------------------------------------------|---------------------------------------------------|
| Lufele, Umbers <sup>48</sup>   | <b>Placenta malaria infection</b>                             |                                                   |
|                                | No infection                                                  | <b>Reference</b>                                  |
|                                | Acute infection                                               | -189.0 (-323.3, -54.6)                            |
|                                | Chronic infection                                             | -63.6 (-199.08, -71.7)                            |
| Senn, Baiwog <sup>51</sup>     | Past infection                                                | -76.1 (-159, -6.8)                                |
|                                | <b>Malaria infection</b>                                      |                                                   |
|                                | Non-infected                                                  | <b>Reference</b>                                  |
|                                | Infected                                                      | -42 (NR)                                          |
| Stanisic, Moore <sup>52</sup>  | <b>Submicroscopic Plasmodium falciparum malaria infection</b> |                                                   |
|                                | Negative                                                      | <b>Reference</b>                                  |
|                                | Positive                                                      | -64 (-188, 59)                                    |
|                                | <b>Clinical history taken during antenatal care</b>           |                                                   |
|                                | No                                                            | <b>Reference</b>                                  |
|                                | Yes                                                           | -104 (-230, 22)                                   |
|                                | <b>Parasitaemia</b>                                           |                                                   |
|                                | No                                                            | <b>Reference</b>                                  |
|                                | Yes                                                           | -30 (-149, 89)                                    |
|                                | <b>Tobacco smoke users</b>                                    |                                                   |
| No                             | <b>Reference</b>                                              |                                                   |
| Yes                            | -197 (-333, -261)                                             |                                                   |
| Senn, Baiwog <sup>51</sup>     | <b>Betel nut users</b>                                        |                                                   |
|                                | Non-users                                                     | <b>Reference</b>                                  |
|                                | Users                                                         | -238 (NR)                                         |
| Ome-Kaius, Unger <sup>49</sup> | <b>Betel nut users</b>                                        |                                                   |
|                                | Non-users                                                     | <b>Reference</b>                                  |
|                                | Users                                                         | -1 (NR)                                           |
| Stanisic, Moore <sup>52</sup>  | <b>Haemoglobin test at enrolment</b>                          |                                                   |
|                                | No                                                            | <b>Reference</b>                                  |
|                                | Yes                                                           | 61 (19, 102)                                      |
|                                | <b>Anaemia</b>                                                |                                                   |
| No                             | <b>Reference</b>                                              |                                                   |
| Yes                            | -101 (-215, 13)                                               |                                                   |
| Fowkes, Davidson <sup>47</sup> | <b>Gravidity and iron deficiency</b>                          |                                                   |
|                                | Primigravida                                                  | 351 (188, 514)                                    |
|                                | Multigravida                                                  | 125 (-28, 277)                                    |
| Senn, Baiwog <sup>51</sup>     | <b>Anaemia (g/l)</b>                                          |                                                   |
|                                | Hb >80                                                        | <b>Reference</b>                                  |
|                                | Hb <80                                                        | -65 NR                                            |
| Stanisic, Moore <sup>52</sup>  | <b>Southeast Asian ovalocytosis infection</b>                 |                                                   |
|                                | Yes                                                           | <b>Reference</b>                                  |
|                                | Infected                                                      | -129 (-287, 29)                                   |
|                                | <b>Alpha thalassemia</b>                                      |                                                   |
|                                | Wildtype                                                      | <b>Reference</b>                                  |
|                                | Heterozygote                                                  | -12 (-159, 135)                                   |
| Homozygote                     | 47 (-100, 194)                                                |                                                   |
| Senn, Baiwog <sup>51</sup>     | <b>Body mass index (kgm3)</b>                                 |                                                   |
|                                | <20                                                           | <b>Reference</b>                                  |
|                                | >20                                                           | -175 (NR)                                         |
| Ome-Kaius, Unger <sup>49</sup> | <b>Mid upper arm circumference (cm)</b>                       |                                                   |
|                                | >23                                                           | <b>Reference</b>                                  |
|                                | <23                                                           | -99 (NR)                                          |

|                                |                                  |                  |
|--------------------------------|----------------------------------|------------------|
|                                | <b>Short stature</b>             |                  |
|                                | >150cm                           | <b>Reference</b> |
|                                | <150 cm                          | -151 (NR)        |
| Senn, Baiwog <sup>51</sup>     | <b>Gravidity</b>                 |                  |
|                                | Multigravida                     | <b>Reference</b> |
|                                | Primigravida                     | -467 (NR)        |
|                                | <b>Hypertension</b>              |                  |
|                                | No                               | <b>Reference</b> |
|                                | Yes                              | -117 (NR)        |
|                                | <b>Haemoglobin (g/l)</b>         |                  |
|                                | >80                              | <b>Reference</b> |
|                                | <80                              | -65 (NR)         |
|                                | <b>Antenatal care</b>            |                  |
| <b>Yes</b>                     | <b>Reference</b>                 |                  |
| No                             | -23 (NR)                         |                  |
| Ome-Kaius, Unger <sup>49</sup> | <b>Gravidity</b>                 |                  |
|                                | Multigravida                     | <b>Reference</b> |
|                                | Primigravida                     | -214 (NR)        |
|                                | <b>Fewer antenatal visits</b>    |                  |
|                                | ≥3 visits                        | <b>Reference</b> |
|                                | 1-2 visits                       | -73 (NR)         |
|                                | <b>Infant sex</b>                |                  |
|                                | Male                             | <b>Reference</b> |
|                                | Female                           | -78 (NR)         |
|                                | <b>Malaria prophylaxis</b>       |                  |
|                                | Yes                              | <b>Reference</b> |
|                                | No                               | 44 (NR)          |
|                                | <b>Use of bed net</b>            |                  |
| Regular                        | <b>Reference</b>                 |                  |
| Irregular                      | 16 (NR)                          |                  |
| Stanisic, Moore <sup>52</sup>  | <b>Use of bed net</b>            |                  |
|                                | No                               | <b>Reference</b> |
|                                | Yes                              | -40 (-165, 84)   |
|                                | <b>Gravidity</b>                 |                  |
|                                | Primigravida                     | <b>Reference</b> |
| Multigravida                   | 325 (211, 439)                   |                  |
| Ome-Kaius, Unger <sup>49</sup> | <b>PNG ethnicity</b>             |                  |
|                                | Highlander                       | <b>Reference</b> |
|                                | Non-Highlander                   | -311 (NR)        |
|                                | <b>Received income</b>           |                  |
|                                | Yes                              | <b>Reference</b> |
| No                             | -22 (NR)                         |                  |
| Senn, Baiwog <sup>51</sup>     | <b>Socio-economic level</b>      |                  |
|                                | High                             | <b>Reference</b> |
|                                | Low                              | -54 (NR)         |
|                                | <b>Education level</b>           |                  |
|                                | High                             | <b>Reference</b> |
|                                | Low                              | -33 (NR)         |
| Stanisic, Moore <sup>52</sup>  | <b>Maternal education status</b> |                  |
|                                | No education                     | <b>Reference</b> |
|                                | Primary education                | 100 (-104, 305)  |
|                                | Secondary education              | 79 (-127, 286)   |

**Abbreviation.** cm: centimetre, kgm<sup>3</sup>:kilogram per cubic metre, g/l: grams per litre, Hb: haemoglobin, NR: confidence interval not reported. Note: Effect estimate illustrated changes in mean birth weight in grams.

**Supplementary file 9:** Reported adverse birth outcomes and counts of risk factors nominated by health professionals interviewed (n=18)

| <b>Reported adverse birth outcomes</b>                  | <b>Health professionals (n=18)</b> |
|---------------------------------------------------------|------------------------------------|
| Preterm birth                                           | 14                                 |
| LBW                                                     | 12                                 |
| SGA                                                     | 11                                 |
| Stillbirth                                              | 8                                  |
| Miscarriage or abortion                                 | 8                                  |
| <b>Reported risk factors for adverse birth outcomes</b> |                                    |
| Physical and emotional stress                           | 13                                 |
| Teenaged pregnancy                                      | 11                                 |
| Malaria during pregnancy                                | 11                                 |
| Poverty                                                 | 11                                 |
| Poor antenatal care access                              | 10                                 |
| Pre-eclampsia                                           | 10                                 |
| Anaemia and iron deficiency                             | 9                                  |
| Sexually transmitted infections including HIV           | 9                                  |
| Hypertension or pregnancy-induced hypertension          | 7                                  |
| Unplanned or unwanted pregnancies                       | 6                                  |
| Substance use (betel nut, tobacco, kava and marijuana)  | 7                                  |
| Type 2 diabetes or gestational diabetes                 | 5                                  |
| Abortion (spontaneous)                                  | 5                                  |
| History of rheumatic heart disease                      | 4                                  |
| Domestic violence                                       | 5                                  |
| Maternal illiteracy                                     | 5                                  |
| Poor nutrition                                          | 4                                  |
| Tuberculosis                                            | 4                                  |
| Falls and accidents                                     | 3                                  |
| Poor health seeking behaviour                           | 3                                  |
| Urinary tract infection and intrauterine infection      | 2                                  |
| Food taboo                                              | 2                                  |
